# Supplementary material
Source: PubMed Central journal article supplement (PMC3141999)
Supplement: 1108926108_pnas.201108926SI.pdf [file 1108926108_pnas.201108926SI.pdf]

# Supporting Information

Eleftherianos et al. 10.1073/pnas.1108926108

## SI Materials and Methods

**Quantitative and Semiquantitative RT-PCR.** Primers used for quantitative real-time PCR were as follows: Rpl32 forward, 5'-GACGCTTCAAGGGACAGTATCTG-3', and reverse, 5'-AAACGCGTTCTGCATGAG-3'; FHV1 forward, 5'-TTTAGAGCACATGCGTCCAG-3', and reverse, 5'-CGCTCACITTTCTTCGGATA-3'; FHV2 forward, 5'-CAACGTCGAACCTTGATG-CAG-3', and reverse, 5'-GCTATACAGGGCATTTCCAA-3'; DCV forward, 5'-TCATCGGTATGCACATTGCT-3', and reverse, 5'-CGCATAACCATGCTCTTCTG-3'. Gene expression was normalized to the expression of RNA encoding the "housekeeping" ribosomal protein L32 (Rpl32), used as a loading control, and the data represented as the ratio  $2^{CT(Rpl32)}/2^{CT(FHV)}$ .

For *dSUR*, *Ir*, and *Irk2* expression studies in *Drosophila*, single-step semiquantitative RT-PCR was performed with the Brilliant II RT-PCR Core Reagent Kit (Stratagene) as described previously (1). Sequences of primers used for semiquantitative RT-PCR were as follows: *dSUR* forward 5'-TCGCCAGCTATCCGTATTTTC-3', and reverse, 5'-TGCCACCGTACTGATCACAT-3'; *Ir* forward 5'-ACGCACACAATGATCTGGAG-3', and reverse, 5'-ATGGTAGTGGGCCAGATGAA-3'; *Irk2* forward 5'-GGAGTGTCCACCTGAGTGGT-3', and reverse, 5'-TCA-TGATGTGCTTCCAGTCC-3'. Amplifications were performed

under the following cycling conditions: 45 °C for 30 min; 95 °C for 10 min; 25 cycles of 95 °C for 30 s, 64 °C for 1 min, and 72 °C for 30 s. PCR control reactions for Rpl32 were performed at 20 cycles. PCR controls without template or reverse transcriptase were also included.

**Median Tissue Culture Infective Dose Assays.** Infected flies were homogenized in Schneider's *Drosophila* media (BioWest), and following centrifugation of fly parts, supernatants were filtered and dilutions of virus suspensions were used to infect *D. melanogaster* Kc167 cells plated out in wells of a 96-well plate ( $1.2 \times 10^5$  cells/well). Following incubation of infected cells at 23 °C for 1 d, cells were fixed in 8% formaldehyde solution for 10 min at room temperature, washed twice in PBS and 0.1% Triton X-100 (PBT) and blocked in blocking solution (PBS, 10% FBS; Thermo Scientific HyClone) for 30 min at room temperature. Cells were incubated with polyclonal antibodies to FHV capsid (1:500 dilution in blocking solution) for 2 h at room temperature, washed twice in PBT solution, and stained with goat anti-rabbit IgG FITC secondary antibodies (Invitrogen; 1:500 dilution in blocking solution) for 1 h at room temperature. Finally, cells were dried following washing in PBT solution and FHV titer was determined by fluorescence microscopy (Zeiss AxioScope 2).

1. Croker B, et al. (2007) ATP-sensitive potassium channels mediate survival during infection in mammals and insects. *Nat Genet* 39:1453-1460.

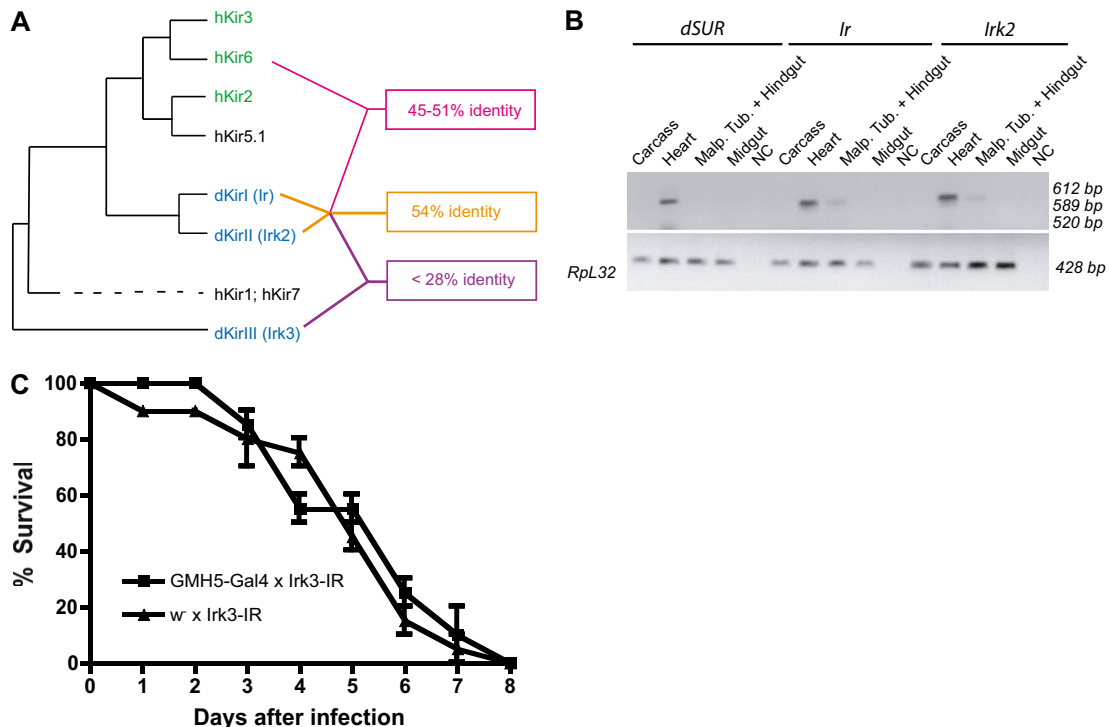

**Fig. S1.** *Drosophila Ir* and *Irk2* genes are orthologs to human *Kir6.x* genes, and are expressed in the heart. (A) Phylogenetic comparison of *Kir* genes in *Drosophila* and human. (B) Semiquantitative RT-PCR was used to analyze the expression of *dSUR*, *Ir*, and *Irk2* genes in different tissues dissected from wild-type flies. The sizes of the amplicons are 612 bp (*dSUR*), 589 bp (*Irk2*), and 520 bp (*Ir*). Note that *Ir* and *Irk2* are highly expressed in the *Drosophila* heart, like *dSUR*. The gene encoding the ribosomal protein Rpl32 was used as a control. For B, data represent three independent experiments involving dissection of tissues from at least 50 flies. (C) Survival curves of flies obtained from crosses between UAS-Irk3 RNAi line (IR, inverted repeat) with the heart-specific GMH5-Gal4 driver and control flies (UAS-Irk3 RNAi line crossed with *w*<sup>-</sup> flies) after infection with FHV. Data represent the mean  $\pm$  SD of two independent experiments, each involving two groups of 10 flies.





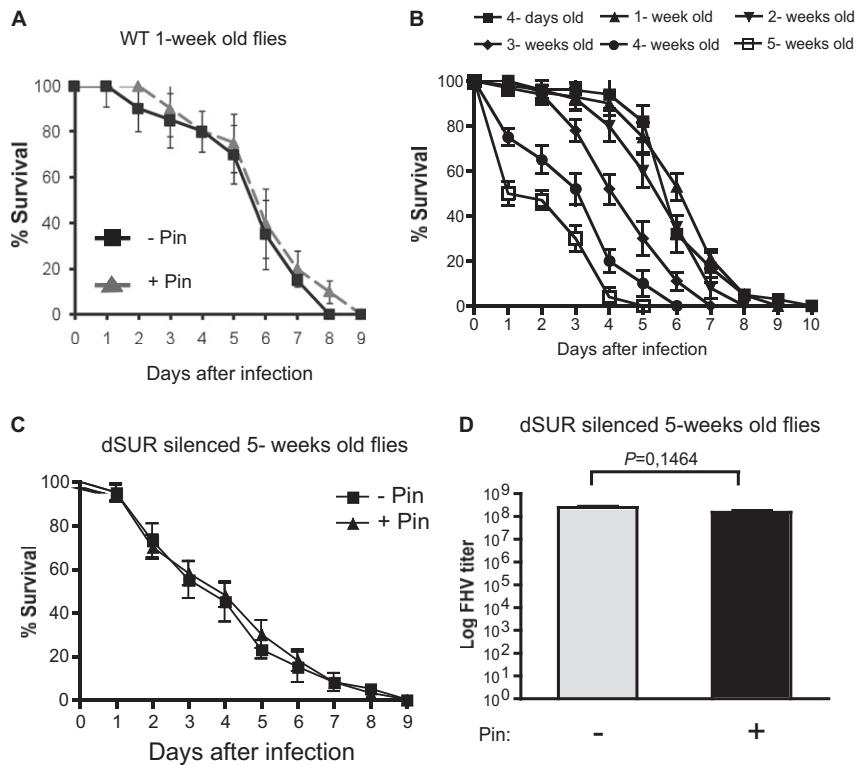

**Fig. 54.** The  $K_{ATP}$  channel agonist drug pinacidil does not protect old *dSUR* mutant flies against FHV infection. (A) Survival curves of 1-wk-old flies treated or not with pinacidil after FHV infection. (B) Survival curves of aging wild-type flies were determined after infection with FHV. Note the increased lethality in aged flies. (C and D) Survival curves (C) and viral load (D) of *dSUR*-silenced 5-wk-old flies fed on the  $K_{ATP}$  agonist pinacidil or on sucrose solution alone after infection with FHV. FHV titers in infected flies were estimated at 3 d following virus infection. Data represent the mean  $\pm$  SD of three independent experiments, each containing two groups of 10 flies.

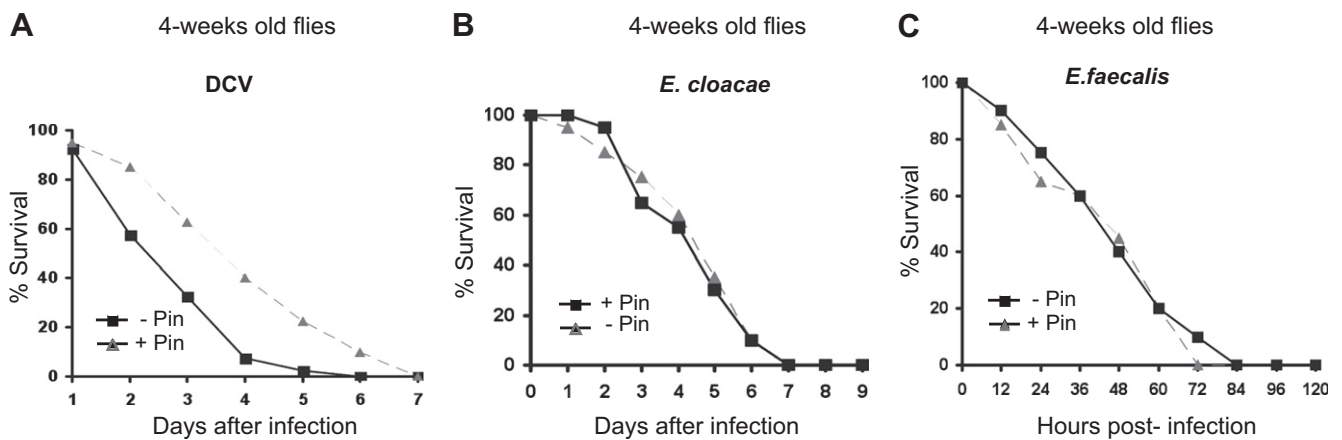

**Fig. 55.** The  $K_{ATP}$  channel agonist drug pinacidil does not significantly improve resistance of old flies to other infections. Survival curves of *w<sup>-</sup>* wild-type 4-wk-old flies fed on the  $K_{ATP}$  agonist pinacidil or on sucrose solution alone after infection with DCV (A), the Gram-negative bacteria *Enterobacter cloacae* (B), and the Gram-positive bacteria *Enterococcus faecalis* (C). A representative experiment involving two groups of 10 flies per treatment is shown.
